# Supplementary material for: Clinical Multi-Omics Study on the Gut Microbiota in Critically Ill Patients After Cardiovascular Surgery Combined With Cardiopulmonary Bypass With or Without Sepsis (MUL-GM-CSCPB Study): A Prospective Study Protocol
Source: PubMed Central journal article supplement (PMC7360671; doi:10.3389/fmed.2020.00269), 2020-07-08
Supplement: Table_1.pdf [file Table_1.pdf]

## MUL-GM-CSCP Study

### Data Recording Sheet

|                                           |                                                                                                                                            |           |                 |                        |                            |                                         |                |                    |                          |                     |  |
|-------------------------------------------|--------------------------------------------------------------------------------------------------------------------------------------------|-----------|-----------------|------------------------|----------------------------|-----------------------------------------|----------------|--------------------|--------------------------|---------------------|--|
| <b>Full name</b>                          |                                                                                                                                            | <b>ID</b> |                 | <b>Sex</b>             |                            | <b>Age</b>                              |                | <b>Ad-ICU date</b> |                          | <b>Dis-ICU date</b> |  |
| <b>Diagnosis</b>                          |                                                                                                                                            |           |                 |                        |                            | <b>Cardiopulmonary bypass time(min)</b> |                |                    |                          |                     |  |
| <b>Infection source</b>                   |                                                                                                                                            |           |                 | <b>Primary Outcome</b> | 1. Non-sepsis<br>2. Sepsis |                                         |                |                    | <b>Survival time (d)</b> |                     |  |
| <b>SOFA (if infection)</b>                |                                                                                                                                            |           | <b>APACH II</b> |                        |                            | <b>Secondary Outcome</b>                | 1.ICU Survival |                    | 2. Non-survival          |                     |  |
| <b>Past medical history</b>               | hypertension; diabetes; COPD; chronic heart disease; chronic kidney disease; immune suppression; nervous system disorders; blood diseases; |           |                 |                        |                            |                                         |                |                    |                          |                     |  |
| <b>Primary antibiotics post-operation</b> |                                                                                                                                            |           |                 |                        |                            |                                         |                |                    |                          |                     |  |

|  | Before Cardiac Surgery | Post-operative (in 24-72h) | Variables (worst value)                | Post-operative |
|--|------------------------|----------------------------|----------------------------------------|----------------|
|  |                        |                            | Body temp, °C (worst – high or low)    |                |
|  |                        |                            | WBC count (1000/cu mm)                 |                |
|  |                        |                            | Neutrophils (%)                        |                |
|  |                        |                            | PCT (ng/mL)                            |                |
|  |                        |                            | antibiotics                            |                |
|  |                        |                            | Is it sepsis?                          |                |
|  |                        |                            | pathogenic microorganism(name)         |                |
|  |                        |                            | Infection site                         |                |
|  |                        |                            | Nutrition (1. Enteral; 2. Parenteral;) |                |

|  |  |  |                                |  |
|--|--|--|--------------------------------|--|
|  |  |  | bowel dilatation               |  |
|  |  |  | gastric residual volume        |  |
|  |  |  | Intra-abdominal pressure (IAP) |  |
